# Supplementary material for: The Causes and Consequences of Changes in Virulence following Pathogen Host Shifts
Source: PLoS Pathog. 2015 Mar 16;11(3):e1004728. doi: 10.1371/journal.ppat.1004728 (PMC4361674; doi:10.1371/journal.ppat.1004728)
Supplement: S1 Table — Sequences downloaded from genbank are in blue, sequences generated during this project are in red. (XLSX) [file ppat.1004728.s002.xlsx]

## Sheet: Sheet2
Species		Adh	AmyRel	COI	COII	28S(d1+d2)	RpL32	Sod	Missing per species
Drosophila affinis		AF459744+AF067280	AF037353	U51604.1 + AF519410.1 + JF735915	M95140	AF459744+AF067280+AF037353	KJ746544	U47879	0
Drosophila ambigua		X54813.1	-	EU493630.1	EU493759.1	EF216286	KJ746545	-	2
Drosophila americana		AF136650+U26837.1	AY736529	DQ471597.1	AY646727.1	JF735897	KJ746546	-	1
Drosophila ananassae		AF459754	AF024691	AF050748.1 + AY098462.1	AF474077	JF735891	KJ746547	GENOME SEQUENCE	0
Drosophila arizonae		AY154863.1	KJ746533	DQ383684.1	DQ436072.1	KJ746535 + AJ308078.1	KJ746548	-	1
Drosophila baimaii		AF459777.1	HQ631506.1	EU493625.1	EU493754.1	HQ631433.1	KJ746549	-	1
Drosophila bifasciaita		AF459745+U40986	AF251135	AF050749.1 + U51611.1	M95147	EF216287	KJ746550	U47869	0
Drosophila buzzatii		U65746	-	AF146157.1 + DQ202051.1 + JF735918	AF146169	AF184008.1+X71247	KJ746552	-	2
Drosophila capricorni		AY335196.1	-	EU493637.1	AF474095.1	-	KJ746553	-	3
Drosophila erecta		X54116	AF039562	AF050744.1	GENOME SEQUENCE	X71171	KJ746554	AF127156	0
Drosophila euronotus		AY750132.1	-	EU390738.1	EU390743.1	GU597383.1	KJ746555	-	2
Drosophila flavomontana		U26838.1	-	JF735925	JF735932	JF735901	KJ746556	-	2
Drosophila hydei		X58694	AY733042	DQ471602.1	GU597488	GU597386+X71249	KJ746557	U37714	0
Drosophila immigrans		M97638	AF491632	AF519388.1 + JF735926	AF478424	AF184006.1+X71231	KJ746558	AF021825	0
Drosophila lacicola		U26841.1	-	JF735927	JF735933	JF735902	KJ746559	-	2
Drosophila littoralis		DQ471662.1	AY733045.1	DQ471605.1|	FJ447340.1	JF735905	KJ746560	-	1
Drosophila lummei		DQ471663.1	AY733046.1	DQ471606.1	AY646746.1	JF735906	KJ746561	-	1
Drosophila mauritiana		Z00033	U96157	NC_005779.1	AF474081	X71163 + JF735893	KJ746562	AF127158	0
Drosophila melanogaster		X98338	AF022713	M57910.1	U37541	GU597379+X71159	KJ746563	X17332	0
Drosophila micromelanica		AY750124.1	-	EU493612.1	EU390751.1	KJ746537	KJ746564	-	2
Drosophila miranda		AY238781.1	Y15604.1	AF451104.1	M95148.1	EF216299.1+EF216299.1	KJ746565	AY754566.1	0
Drosophila mojavensis		AY154827	GENOME SEQUENCE	DQ202071.1	AY437255.1	GENOME SEQUENCE+AJ308077	KJ746566	GENOME SEQUENCE	0
Drosophila montana		U26842	-	DQ471608	DQ426799.1	JF735907	KJ746567	-	2
Drosophila nasuta		AB261137.1	AY733059.1	EU493589.1	EU493719.1	GU597398.1	KJ746568	HQ326583.1	0
Drosophila nebulosa		U95275	AY733060	U51603.1+ JF735914	AY335208.1	X71211 + JF735890	KJ746569	AF021830	0
Drosophila novamexicana		AY165542.1	AY736484.1	JF735929	JF735934	AF184015.1+AF184015.1	KJ746570	-	1
Drosophila obscura		U90955+ JF735883	AF306713.1	U51614.1 + JF735919	AF081356	EF216300.1+EF216300.1	KJ746571	U47892	0
Drosophila orena		Z00032.1 OR AY279325.1	U96158.2 OR D21128.1	AY757281.1	AY757269.1	Z28549.1+X71173.1+ JF735909	KJ746572	AF127155.1	0
Drosophila paramelanica		AY750127.1	-	GU597453	GU597483	GU597382	KJ746573	-	2
Drosophila persimilis		M60997	GENOME SEQUENCE	AF451101.1 + U51609.1	M95143	XR_048218	KJ746574	U47873	0
Drosophila prosaltans		HQ110516.1	-	KJ746541 + AF045103.1	HQ110561.1	HQ110538.1	KJ746575	-	2
Drosophila pseudoananassae		AB194424.1	AY736497.1	AY757280.1	AY757268.1	HQ631456.1	KJ746576	-	1
Drosophila pseudoobscura		Y00602	U82556	AF519412.1 + U51606.1 + AF451073.1	AF519348.1	AF184016.1+X71203	KJ746577	U47872	0
Drosophila putrida		-	-	EU493615.1	AF478431.1	AF184000.1	KJ746578	AY081437.1	2
Drosophila santomea		AY804554.1	AY736503	GENOME SEQUENCE	DQ382822	GENOME SEQUENCE	KJ746580	GENOME SEQUENCE	0
Drosophila sechellia		X04672	AF039558	NC_005780.1	AF200832	GENOME SEQUENCE+X71165	KJ746581	AF127157	0
Drosophila simulans		M36581	U96159	NC_005781.1	AF200834	GENOME SEQUENCE+X71161	KJ746582	X15685	0
Drosophila sturtevanti		AB026535.1	AY736506.1	KJ746542 + AY335205.1	HQ110562.1	HQ110542.1	KJ746583	AY335232.1	0
Drosophila subobscura		M55545	U79724	AF519409.1 + U51615.1 + AF050750.1	M95151	EF216305.1	KJ746584	U38233	0
Drosophila takahashii		AF459749	U96161	AB027264.1 + X58915 + JF735911	AF474089	X71177 + JF735892	KJ746585	-	1
Drosophila teissieri		X54118	AF039557	AF050743.1	DQ382819	X71169 + JF735895	KJ746586	AF127160	0
Drosophila tristis		RNA SEQ DJO	RNA SEQ DJO	JF735913	EF216262.1	EF216307.1+EF216307.1	KJ746587	provided by Darren Obbard from RNA seq data	0
Drosophila tropicalis		U95274.1	AF251140.1	KJ746543 + U51601.1	AF474103.1	KJ746538	KJ746588	-	1
Drosophila virilis		U26846	AF136603	DQ471577.1	DQ426813.1 + AY646749.1	AF184014.1+GENOME SEQUENCE	KJ746589	X13831	0
Hirtodrosophila duncani		JF735886	-	GU597473 + JF735916	GU597505	GU597405	KJ746590	-	2
Scaptodrosophila lebanonensis		M97637	-	EU493686 + JF735921	EU493815.1	JF735903	KJ746591	AF021822	1
Scaptodrosophila pattersoni		DQ155671.1	-	EU493687.1	EU493816.1	-	KJ746592	-	3
Zaprionus tuberculatus		X63955.1	AY736524.1	JQ679110.1	EU595373.1	KJ746539	KJ746593	AF021823.1	0
	Missing for each gene	1	13	0	0	2	0	17	33
									Matrix of 336 combinations
Sequences downloaded from Genbank
Sequenced during this project
